# Supplementary material for: Adopting systems models for multiple incident analysis: utility and usability
Source: Oxford University Press journal article supplement (doi:10.1093/intqhc/mzab135), 2021-09-10
Supplement: mzab135_supp.zip [file mzab135_supp.zip]

Archive with 1 entries (1 files):
- Supplementary material_Interview schedule.pdf
