# Supplementary material for: Adopting systems models for multiple incident analysis: utility and usability
Source: Oxford University Press journal article supplement (doi:10.1093/intqhc/mzab135), 2021-09-10
Supplement: mzab135_supp.zip [file mzab135_supp.zip › Supplementary material_Interview schedule.pdf]

## Systems Models for Patient Safety

### Semi-structured schedule for interview following participation in the workshop

#### Welcome

- Welcome and thank you for attending the workshop and agreeing to participate in the interview
- Reminder – the interview will be recorded but anything in the project write-up will be anonymous, though they may recognise themselves

Space to make notes during the interview (though the interview will be recorded with voice and video on MS Teams)

#### Intro to the participant

- Work in the patient safety team; how long and experience of patient safety work prior to joining the team?
- Professional background; what profession (e.g. nurse, pharmacist) and for how long?
- Knowledge, skills and/or experience of working with HFE?
- Any previous knowledge of systems and systems models?

#### PPT presentation and workshop

- Did you view the presentation? How did you find it?

#### The online workshop – generally

- How did you find the online workshop – generally e.g. could you follow it ok (as it was 1.5. hrs and quite fast paced, was there enough time to understand the models and ask questions?

#### Systems models – generally

**I will go through each model in turn in a minute but first a few questions on the systems models generally**

- Is the idea of systems models a concept that's easy to understand?
- Did you understand the models we looked at and the examples given?

- How useful do you think they could be when thinking about patient safety issues?
- How easy to use would they be in a patient safety team/ function (national/ regional/ local)?
- Were they interesting/ enjoyable to study in the workshop?

### **SEIPS model**

For example:

- Was the model clear to understand?
- Do you think it would be easy to use (for any purpose- with little training/ lots of training)?
- Do you think it would be useful to use (for any purpose)?
- Do you think it worked with multiple incidents like the NRLS (and other data) examples?
- What do you think it could be used for in patient safety – as described for potential PSAs or other work?

### **Prompts**

Views of the diagram representing the model

Including colours or a way to highlight themes on the model?

Populating the template on your own/ as a team/ with HFE support

Does it help show what actions might be taken?

Do you think you'd get enough depth for the time it would take to do?

Additions/ subtractions to the model

Merging models?

### **Accimap**

For example:

- Was the model clear to understand?
- Do you think it would be easy to use (for any purpose- with little training/ lots of training)?
- Do you think it would be useful to use (for any purpose)?
- Do you think it worked with multiple incidents like the NRLS (and other data) examples?

- What do you think it could be used for in patient safety – as described for potential PSAs or other work?

Prompts

Views of the diagram representing the model

Including colours or a way to highlight themes on the model?

Populating the template on your own/ as a team/ with HFE support

Does it help show what actions might be taken?

Do you think you'd get enough depth for the time it would take to do?

Additions/ subtractions to the model

Merging models?

### **For your role or us as a team**

For example:

- Could we use one or both models in the team? What for?
- Could we adapt one or both models, for example merge them, add or take away something?
- Did you enjoy working on the examples?
- Would their use add something we don't have covered now?

**Human factors** (if time) – any further comments e.g.:

- Is human factors of interest to you?
- What other areas of human factors would you like us to learn about or consider using as a team?

What else would you like to say about this workshop, topic area (systems models) or subject (human factors)?

Closure and thank you

I will offer to provide feedback to the team, probably as a presentation and discussion topic in a joint team meeting
